# Supplementary material for: A metabolomics perspective reveals the mechanism of the uric acid-lowering effect of Prunus salicina Lindl. cv. “furong” polyphenols in hypoxanthine and potassium oxybate-induced hyperuricemic mice
Source: Royal Society of Chemistry journal article supplement (doi:10.1039/d4fo02391a), 2024-01-01
Supplement: d4fo02391a1.pdf [file d4fo02391a1.pdf]

## Supplementary information

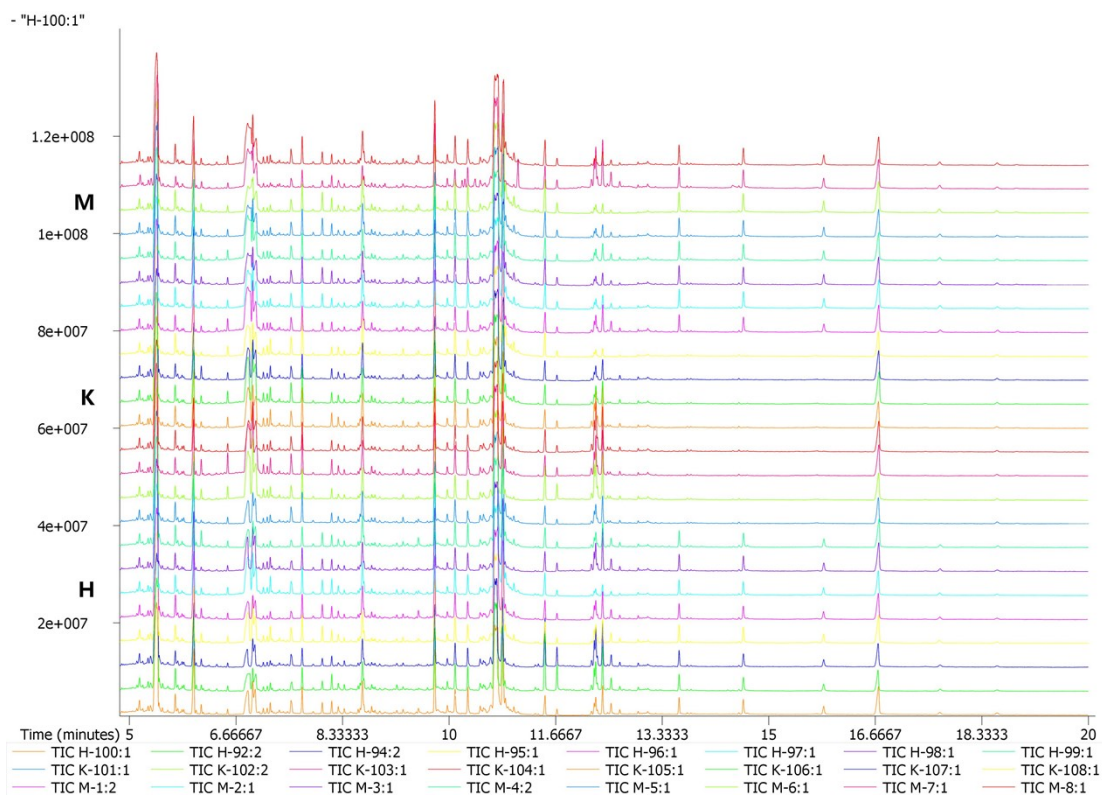

**Fig. S1.** GC-TOF/MS total ion chromatogram of all serum samples.

Note: M: Model group; K: Control group; H: High-dose polyphenols group, the same below.

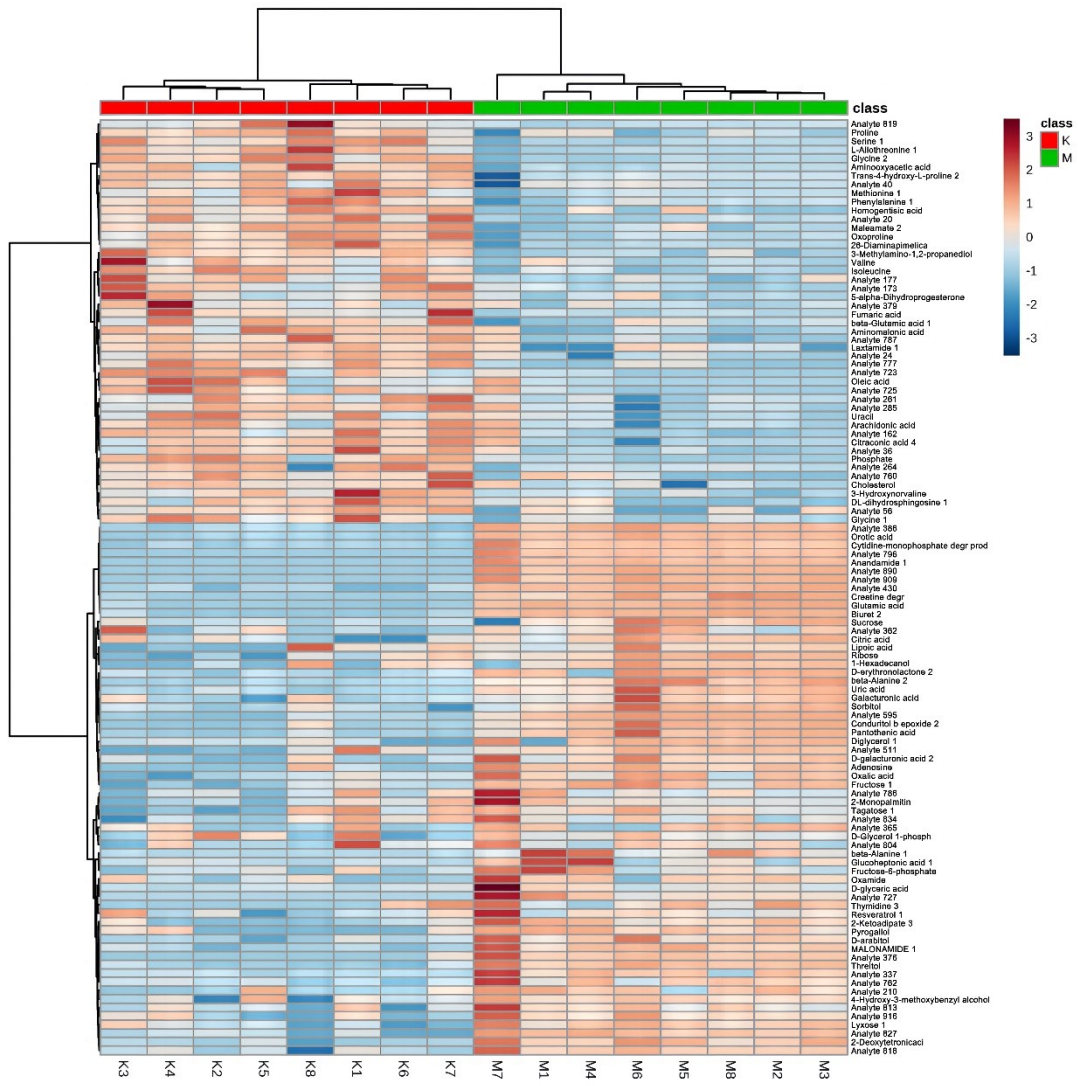

**Fig. S2.** Heat map of hierarchical clustering analysis of potential biomarkers in the model group (M) versus the control group (K).

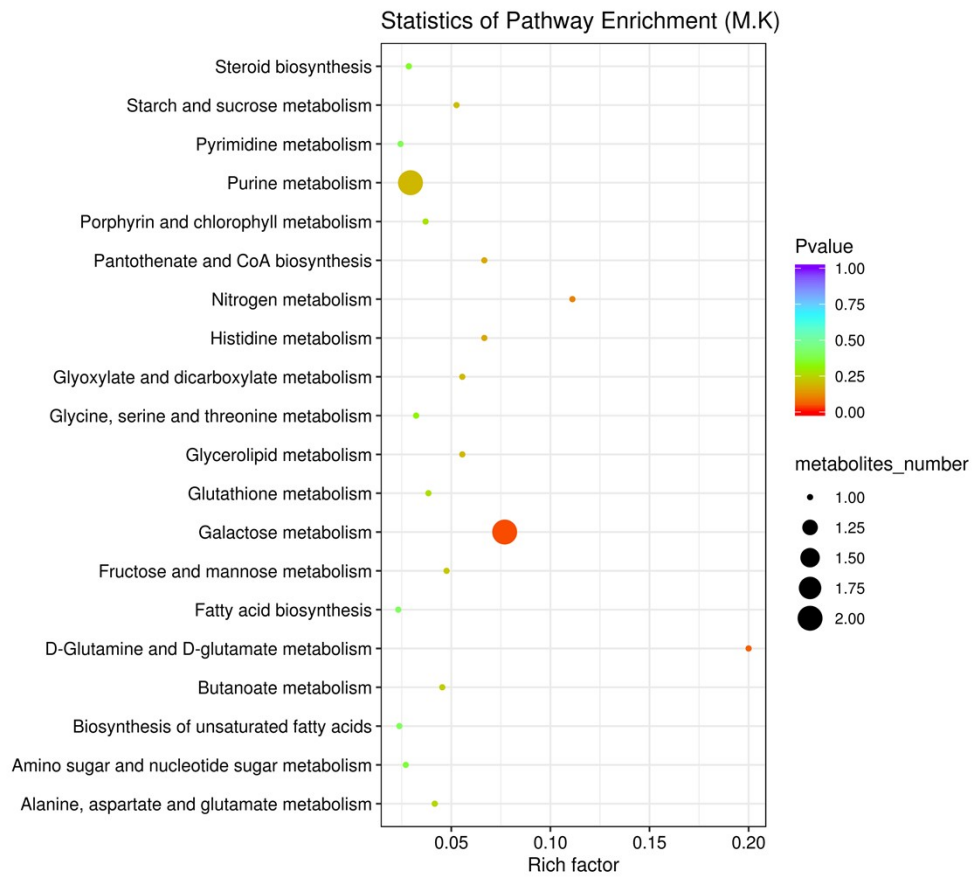

**Fig. S3.** Metabolic pathway analysis of potential biomarkers in control group (K) by model group (M).
